# Supplementary material for: Morning exercise and pre-breakfast metformin interact to reduce glycaemia in people with Type 2 Diabetes: a randomized crossover trial
Source: bioRxiv or medRxiv preprint supplement (doi:10.1101/2023.09.07.23295059), 2023-09-07
Supplement: Supplementary file [file media-2.pdf]

## SUPPLEMENTARY MATERIAL

**Supplementary table 1.** Baseline characteristics by gender. HbA1c, blood glycosylated haemoglobin. Values are mean  $\pm$  SEM (n). P values are from unpaired t-test.

| Characteristic                   | Males (n)                         | Females (n)                        | p value     |
|----------------------------------|-----------------------------------|------------------------------------|-------------|
| Age (years)                      | 58.3 $\pm$ 2.7 (9)                | 63.6 $\pm$ 2.8 (8)                 | 0.20        |
| BMI (Kg/m <sup>2</sup> )         | 31.4 $\pm$ 1.0 (9)                | 29.8 $\pm$ 1.0 (8)                 | 0.28        |
| HbA1c (mmol/mol)                 | 65.6 $\pm$ 5.6 (9)                | 63.1 $\pm$ 4.9 (8)                 | 0.74        |
| HbA1c (%)                        | 8.1 $\pm$ 0.5 (9)                 | 7.9 $\pm$ 0.4 (8)                  | 0.71        |
| Time since T2D diagnosed (years) | 3.6 $\pm$ 0.9 (5)                 | 6.6 $\pm$ 1.6 (7)                  | 0.26        |
| Dose of Metformin per day (mg)   | 1500.0 $\pm$ 288.7(3)             | 1250 $\pm$ 155.9(9)                | 0.45        |
| Time of Metformin (years)        | <b>4.0<math>\pm</math>1.0 (5)</b> | <b>11.4<math>\pm</math>2.4 (8)</b> | <b>0.04</b> |
| Number of steps                  | 7114 $\pm$ 984.4 (9)              | 6481 $\pm$ 713.2 (9)               | 0.60        |

**Supplementary table 2.** Baseline characteristics by season. HbA1c, blood glycosylated haemoglobin. Values are mean  $\pm$  SEM (n). P values are from unpaired t-test.

| Characteristic                   | Winter (n)                            | Summer (n)                            | p value     |
|----------------------------------|---------------------------------------|---------------------------------------|-------------|
| Age (years)                      | 60.5 $\pm$ 2.3 (10)                   | 61.29 $\pm$ 3.87 (7)                  | 0.86        |
| BMI (Kg/m <sup>2</sup> )         | 30.4 $\pm$ 0.9 (10)                   | 31.0 $\pm$ 1.3 (7)                    | 0.69        |
| HbA1c (mmol/mol)                 | <b>70.7<math>\pm</math>4.9 (10)</b>   | <b>55.6<math>\pm</math>3.5 (7)</b>    | <b>0.04</b> |
| HbA1c (%)                        | <b>8.7<math>\pm</math>0.4 (10)</b>    | <b>7.3<math>\pm</math>0.3 (7)</b>     | <b>0.03</b> |
| Time since T2D diagnosed (years) | 4.6 $\pm$ 2.2 (5)                     | 5.8 $\pm$ 1.0 (7)                     | 0.59        |
| Dose of Metformin per day (mg)   | <b>1042.0<math>\pm</math>100.3(6)</b> | <b>1583.0<math>\pm</math>200.7(6)</b> | <b>0.04</b> |
| Time of Metformin (years)        | 10.3 $\pm$ 3.5 (6)                    | 7.0 $\pm$ 1.6 (7)                     | 0.38        |
| Number of steps                  | 6184 $\pm$ 655.9 (11)                 | 7761 $\pm$ 1094 (7)                   | 0.20        |

**Supplementary table 3.** Baseline characteristics by metformin timing during baseline period. HbA1c, blood glycosylated haemoglobin. Values are mean  $\pm$  SEM (n). P values are from unpaired t-test.

| Baseline period                  |                                |                               |         |
|----------------------------------|--------------------------------|-------------------------------|---------|
| Characteristic                   | Metformin before breakfast (n) | Metformin after breakfast (n) | p value |
| Age (years)                      | 59.1 $\pm$ 2.6 (9)             | 64.3 $\pm$ 4.0 (4)            | 0.30    |
| BMI (Kg/m <sup>2</sup> )         | 30.6 $\pm$ 1.3 (9)             | 30.8 $\pm$ 1.1 (5)            | 0.91    |
| HbA1c (mmol/mol)                 | 56.6 $\pm$ 4.6 (9)             | 68.8 $\pm$ 6.6 (5)            | 0.26    |
| HbA1c (%)                        | 7.6 $\pm$ 0.4 (9)              | 8.4 $\pm$ 0.6 (5)             | 0.27    |
| Time since T2D diagnosed (years) | 8.4 $\pm$ 2.5 (9)              | 10.7 $\pm$ 0.9 (3)            | 0.64    |
| Dose of Metformin per day (mg)   | 1918.0 $\pm$ 511.3(8)          | 1333.0 $\pm$ 333.3(3)         | 0.52    |
| Time of Metformin (years)        | 6.4 $\pm$ 1.2 (8)              | 3.7 $\pm$ 2.7 (3)             | 0.29    |
| Number of steps                  | 7396 $\pm$ 1025 (9)            | 6133 $\pm$ 801.5 (5)          | 0.42    |

**Supplementary table 4.** Baseline characteristics by metformin timing in the morning exercise period. HbA1c, blood glycosylated haemoglobin. Values are mean  $\pm$  SEM (n). P values are from unpaired t-test.

| <b>Morning exercise</b>          |                                       |                                      |                |
|----------------------------------|---------------------------------------|--------------------------------------|----------------|
| <b>Characteristic</b>            | <b>Metformin before breakfast (n)</b> | <b>Metformin after breakfast (n)</b> | <b>p value</b> |
| Age (years)                      | 59.1 $\pm$ 2.9 (8)                    | 63.4 $\pm$ 3.5 (5)                   | 0.86           |
| BMI (Kg/m <sup>2</sup> )         | 30.8 $\pm$ 1.4 (8)                    | 30.8 $\pm$ 1.1 (5)                   | 0.99           |
| HbA1c (mmol/mol)                 | <b>56.9<math>\pm</math>4.3 (8)</b>    | <b>75.2<math>\pm</math>4.7 (5)</b>   | <b>0.01</b>    |
| HbA1c (%)                        | <b>7.3<math>\pm</math>0.4 (6)</b>     | <b>9.0<math>\pm</math>0.4 (5)</b>    | <b>0.02</b>    |
| Time since T2D diagnosed (years) | 5.6 $\pm$ 1.0 (7)                     | 4.7 $\pm$ 3.7 (3)                    | 0.74           |
| Dose of Metformin per day (mg)   | 1357.0 $\pm$ 179.8(7)                 | 1167 $\pm$ 166.7(3)                  | 0.54           |
| Time of Metformin (years)        | <b>10.3<math>\pm</math>3.5 (8)</b>    | <b>7.0<math>\pm</math>1.6 (3)</b>    | <b>0.02</b>    |
| Number of steps                  | 7056 $\pm$ 1096 (8)                   | 6752 $\pm$ 1141 (5)                  | 0.86           |

**Supplementary table 5.** Baseline characteristics by metformin timing in the evening exercise period. HbA1c, blood glycosylated haemoglobin. Values are mean  $\pm$  SEM (n). P values are from unpaired t-test.

| <b>Evening exercise</b>          |                                       |                                      |                |
|----------------------------------|---------------------------------------|--------------------------------------|----------------|
| <b>Characteristic</b>            | <b>Metformin before breakfast (n)</b> | <b>Metformin after breakfast (n)</b> | <b>p value</b> |
| Age (years)                      | 60.9 $\pm$ 1.8 (8)                    | 61.0 $\pm$ 8.7 (3)                   | 0.98           |
| BMI (Kg/m <sup>2</sup> )         | 30.5 $\pm$ 1.3 (8)                    | 32.6 $\pm$ 1.5 (3)                   | 0.41           |
| HbA1c (mmol/mol)                 | 66.7 $\pm$ 5.8 (8)                    | 60.3 $\pm$ 7.6 (3)                   | 0.55           |
| HbA1c (%)                        | 8.2 $\pm$ 0.5 (8)                     | 7.7 $\pm$ 0.7 (3)                    | 0.55           |
| Time since T2D diagnosed (years) | 11.0 $\pm$ 3.4 (6)                    | 9.0 $\pm$ 2.5 (3)                    | 0.71           |
| Dose of Metformin per day (mg)   | 1333.0 $\pm$ 166.7(6)                 | 1333.0 $\pm$ 333.3(3)                | 0.99           |
| Time of Metformin (years)        | <b>8.2<math>\pm</math>1.0 (8)</b>     | <b>2.0<math>\pm</math>1.0 (3)</b>    | <b>0.008</b>   |
| Number of steps                  | 6264 $\pm$ 758.3 (8)                  | 5603 $\pm$ 1119 (3)                  | 0.65           |

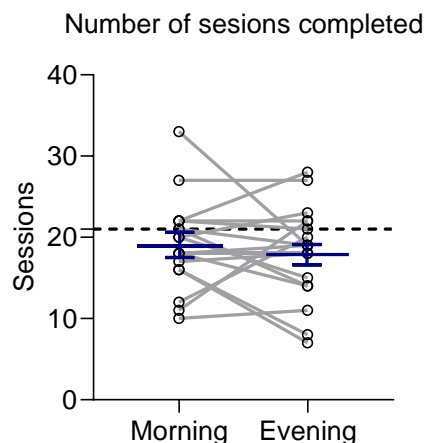

**Supplementary Figure 1.** Number of exercise sessions completed during trial in the morning and evening exercise periods (n=18), blue lines are mean $\pm$ SEM, the dotted line represents the number of sessions participants were asked to complete. Data were analysed using paired t-test.

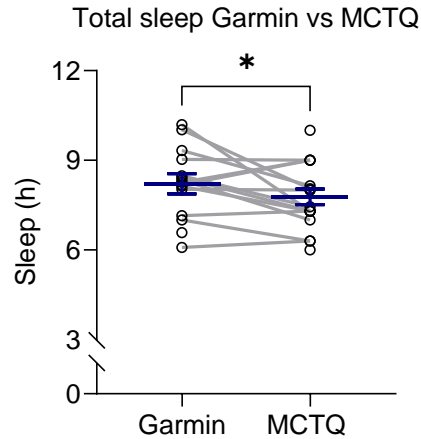

**Supplementary Figure 2.** Total hours of sleep from Garmin devices at baseline (Garmin) and Munich Chronotype Questionnaires (MCTQ) (n=14), blue lines are mean±SEM, data were analysed using paired t-test. \*= $p < 0.05$ .

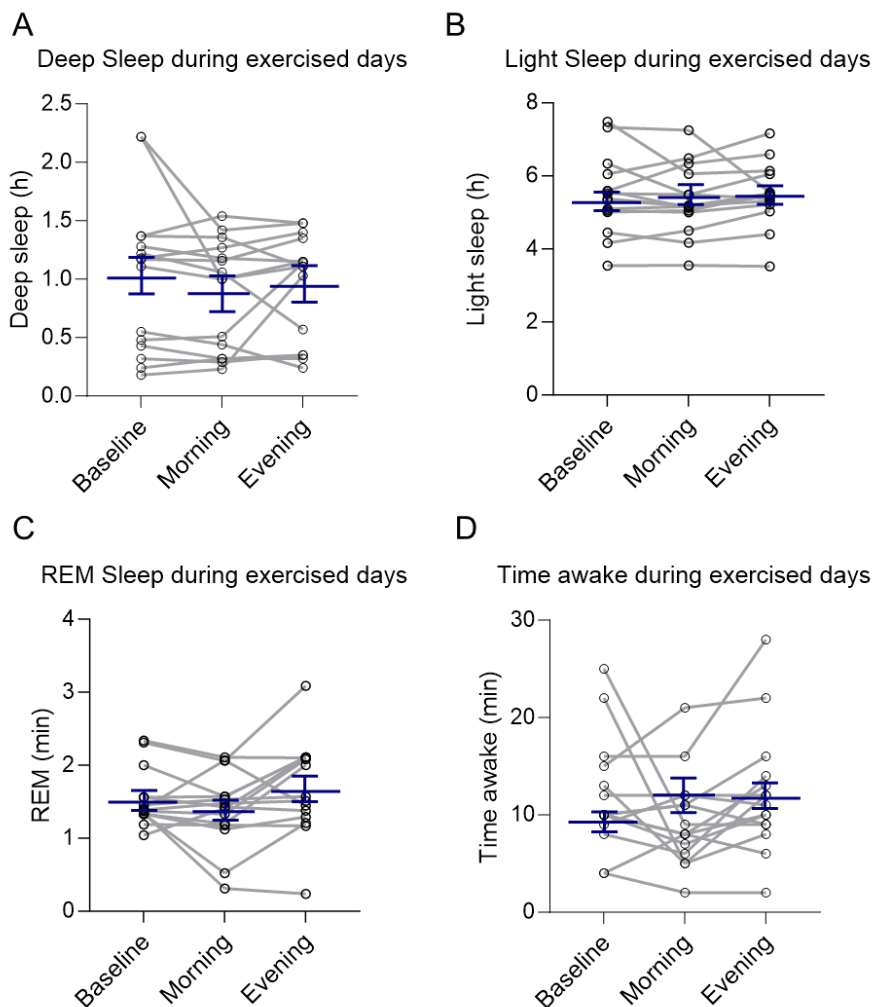

**Supplementary Figure 3.** Sleep architecture in the baseline, and morning and evening exercise periods of the trial. The values are shown (A) Deep sleep (n=15), (B) Light sleep (n=15), (C) REM sleep (n=15) and (D) Time awake (n=15), blue lines are mean±SEM. Data were analysed using one-way ANOVA followed up by Holm-Šidák's multiple comparisons test.

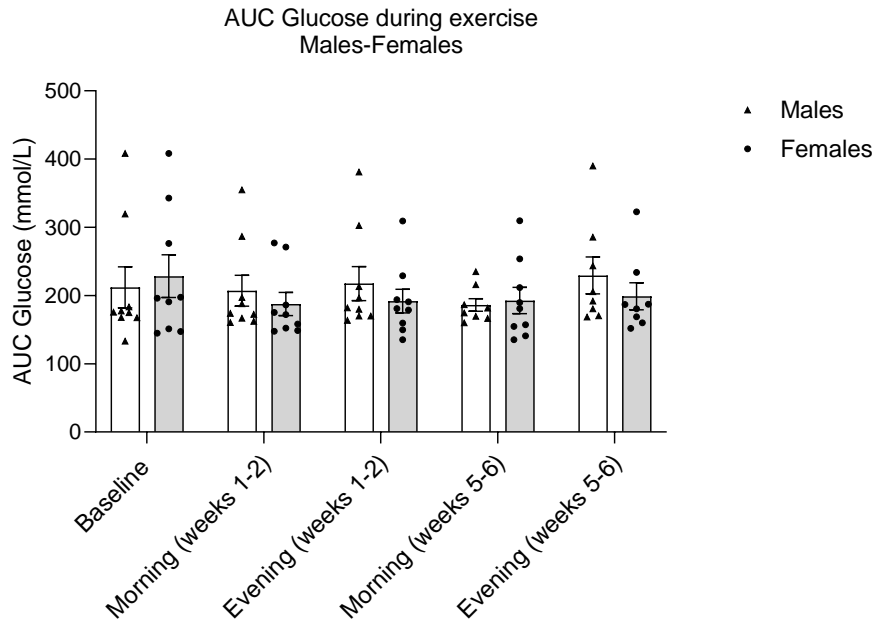

**Supplementary figure 4.** Mean area under the curve (AUC) glucose concentrations over 24-hours hourly during baseline, and morning and evening exercise split by sex. Glucose levels in Males weeks 1-2 (n=9), weeks 5-6 (n=8); Females weeks 1-2 (n=9), weeks 5-6 (n=8). Values are mean±SEM. Data were analysed using two-way mixed-model ANOVA followed up by Holm-Šídák's multiple comparisons test.

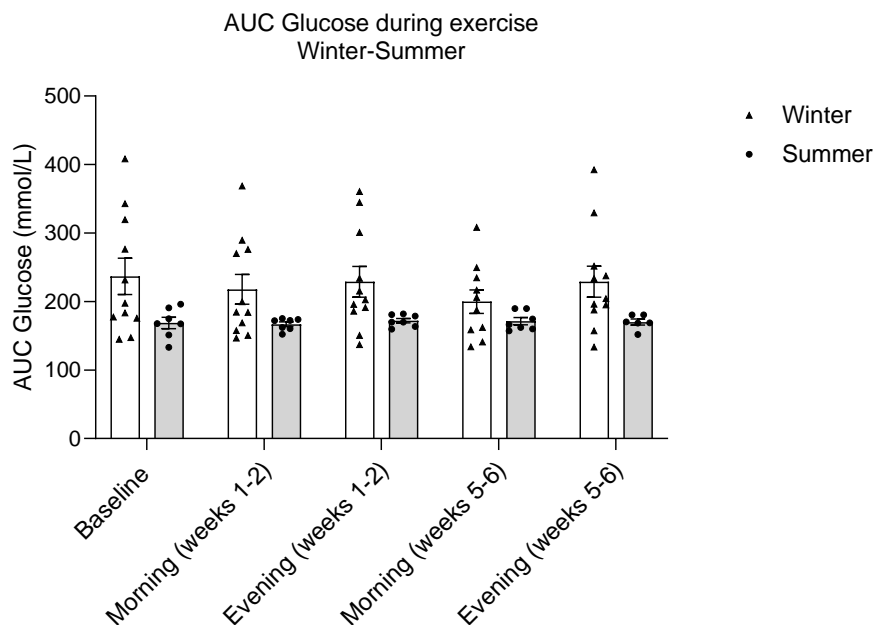

**Supplementary Figure 5.** Mean area under the curve (AUC) values over 24-hours hourly in baseline, and morning and evening exercise periods split by season. Winter weeks 1-2 (n=11), weeks 5-6 (n=10). Summer weeks 1-2 (n=7), weeks 5-6 (n=6). Values are mean±SEM. Data were analysed using two-way mixed-model ANOVA followed up by Holm-Šídák's multiple comparisons test.

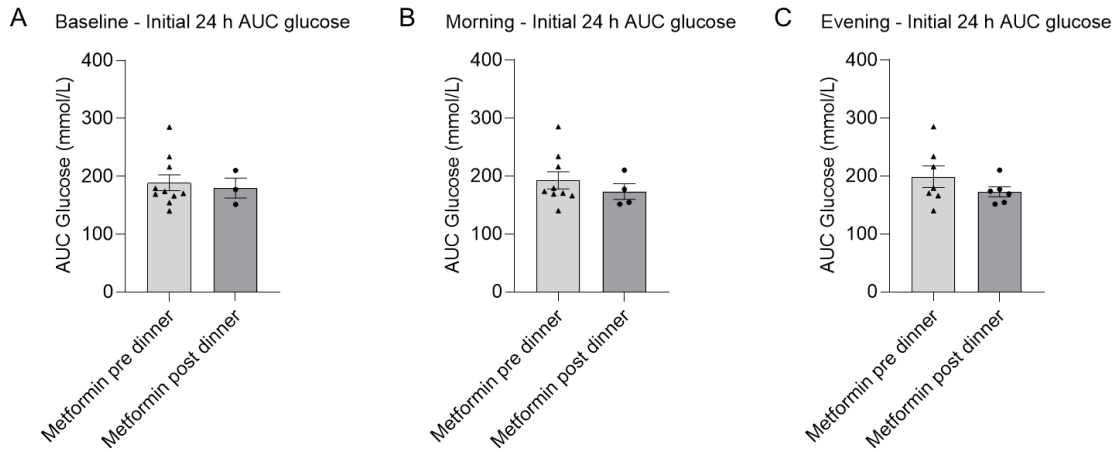

**Supplementary Figure 6.** Meal and metformin timing. Mean area under the curve (AUC) glucose values for the first 24 hours of exercise day comparing Metformin pre and post dinner. (A) Baseline, metformin pre-dinner (n=10), metformin post-dinner (n=3); (B) Morning exercise, metformin pre-dinner (n=9), metformin post-dinner (n=4); (C) Evening exercise, metformin pre-dinner (n=7), metformin post-dinner (n=6). Values are mean $\pm$ SEM. Data were analysed using unpaired t-test.
